# Supplementary material for: Pancreatic Replacement Therapy for Maladaptive Behaviors in Preschool Children With Autism Spectrum Disorder
Source: PubMed Central journal article supplement — JAMA Netw Open. 2023 Nov 30;6(11):e2344136. doi: 10.1001/jamanetworkopen.2023.44136 (PMC10690476; doi:10.1001/jamanetworkopen.2023.44136), 2023-11-30
Supplement: jamanetwopen-e2344136-s001.pdf [file jamanetwopen-e2344136-s001.pdf]

## Supplemental Online Content

Pearson DA, Hendren RL, Heil MF, McIntyre WR, Raines SR. Pancreatic replacement therapy for maladaptive behaviors in preschool children with autism spectrum disorder. *JAMA Netw Open*. 2023;6(11):e2344136. doi:10.1001/jamanetworkopen.2023.44136

**eTable 1.** Clinical Trial Sites

**eTable 2.** Inclusion/Exclusion Criteria

**eTable 3.** Participant Demographics

**eTable 4.** Autism Diagnostic Interview Revised (ADI-R): Subscale Scores at Baseline

**eFigure.** Neurodevelopmental Gap in Brain Synthesis Capacity in Autistic Children Compared With Non-Autistic Children

**eTable 5.** Participant Disposition

**eTable 6.** Fecal Chymotrypsin Data

**eTable 7.** Responder Analysis

**eTable 8.** CGI: Severity

**eTable 9.** CGI: Improvement

**eTable 10.** CGI: Improvement—Most Severe

This supplemental material has been provided by the authors to give readers additional information about their work.

**eTable 1. Clinical Trial Sites**

| Site Name                                                                                                     | Site Type        |
|---------------------------------------------------------------------------------------------------------------|------------------|
| University of Arizona Medical Center                                                                          | University       |
| Children's Specialized Hospital                                                                               | Hospital         |
| Children's Specialized Hospital (Egg Harbor)                                                                  | Stand-Alone      |
| SAARC - Southwest Autism Research Center Resource Center                                                      | Stand-Alone      |
| University of Texas, Houston UT BBSB                                                                          | University       |
| Pediatric Research, University of Toledo                                                                      | University       |
| MIND Institute, University of California, Davis                                                               | University       |
| Cleveland Clinic Autism Center Children's Hospital for Rehabilitation                                         | Hospital         |
| Duke University Center for Autism and Brain Development                                                       | University       |
| Detroit Clinic Research Center                                                                                | Stand-Alone      |
| APG Research LLC                                                                                              | Stand-Alone      |
| Advent Health Medical Group Pediatrics at Orange County                                                       | Pediatric Office |
| PRIME-Psychiatric Research Inst. Of Montefiore Einstein Autism & Obsessive Compulsive Spectrum Program        | Hospital         |
| LSU Health Sciences Center, Dept. of Psychopharmacology Research                                              | University       |
| Lovelace Scientific Resources, The Mind Network, Univ. of New Mexico                                          | University       |
| Omega Medical Research                                                                                        | Stand-Alone      |
| UCSF (Univ. of California, SF) PRONTO (Program for Research on Neurodevelopmental and Translational Outcomes) | University       |
| Carilion Clinic, Virginia Tech, Carilion School of Medicine                                                   | University       |
| The Focus Center                                                                                              | Stand-Alone      |
| Vanderbilt University Behavioral Health                                                                       | University       |
| NRC Research Institute                                                                                        | Stand-Alone      |
| Pediatric Clinical Research Unit, Arkansas Children's Hospital                                                | Hospital         |
| Yale Child Study Center, Center for Translational Developmental Neuroscience                                  | University       |
| Richmond Behavioral Associates                                                                                | Stand-Alone      |
| Lake Charles Clinical Trials                                                                                  | Stand-Alone      |
| IMMUNOe Research Centers                                                                                      | Stand-Alone      |
| CRCNJ                                                                                                         | Stand-Alone      |
| NeuroScience, Inc.                                                                                            | Stand-Alone      |
| Research Institute at Deaconess Clinic                                                                        | Hospital         |
| Segal Institute for Clinical Research, Charleston Outpatient Clinic                                           | Stand-Alone      |
| Univ. of Virginia, Center for Psychopharmacology in Youth                                                     | University       |
| Segal Institute for Clinical Research                                                                         | Stand-Alone      |

**eTable 2. Inclusion/Exclusion Criteria**

|                            |                                                                                                                                                                                                                                                                                                                                                                                                                                                                                                                                                                                                                                                                                                                                                                                                                                                                                                                                                                                                                                                                                                                                                                                                                                                                                                                                                                                                                                                                                                                                                                                                                                                                                                                                                                                                                                                                                                                                                                                                                                                                                                                                                              |
|----------------------------|--------------------------------------------------------------------------------------------------------------------------------------------------------------------------------------------------------------------------------------------------------------------------------------------------------------------------------------------------------------------------------------------------------------------------------------------------------------------------------------------------------------------------------------------------------------------------------------------------------------------------------------------------------------------------------------------------------------------------------------------------------------------------------------------------------------------------------------------------------------------------------------------------------------------------------------------------------------------------------------------------------------------------------------------------------------------------------------------------------------------------------------------------------------------------------------------------------------------------------------------------------------------------------------------------------------------------------------------------------------------------------------------------------------------------------------------------------------------------------------------------------------------------------------------------------------------------------------------------------------------------------------------------------------------------------------------------------------------------------------------------------------------------------------------------------------------------------------------------------------------------------------------------------------------------------------------------------------------------------------------------------------------------------------------------------------------------------------------------------------------------------------------------------------|
| <p>Inclusion Criteria:</p> | <ol style="list-style-type: none"> <li>1. Age between 3 and 8 years, inclusive</li> <li>2. If the child is 7 years of age or older, understand and sign a written assent form, if mental capacity allows</li> <li>3. The parent or guardian of the subject must be able to understand and sign a written informed consent document, a waiver of assent document (in some cases), and be able to read English</li> <li>4. Meets the current Diagnostic and Statistical Manual for Mental Disorders (DSM-IV-TR) diagnostic criteria for autistic disorder (AD), screened by the SCQ and confirmed by the ADI-R.</li> <li>5. Aberrant Behavior Checklist: subscale of Irritability/Agitation (ABC-I) score <math>\geq 11.0</math> at enrollment.</li> </ol>                                                                                                                                                                                                                                                                                                                                                                                                                                                                                                                                                                                                                                                                                                                                                                                                                                                                                                                                                                                                                                                                                                                                                                                                                                                                                                                                                                                                     |
| <p>Exclusion Criteria:</p> | <ol style="list-style-type: none"> <li>1. Patient weighing &lt; 13kg</li> <li>2. Allergy to porcine products</li> <li>3. Previous sensitization or allergy to trypsin, pancreatin, or pancrelipase</li> <li>4. History of severe head trauma, as defined by loss of consciousness or hospitalization, skull fracture or stroke.</li> <li>5. Seizure within the last year prior to enrollment, or the need for seizure medications either at present or in the past.</li> <li>6. Diagnosed with any of the following:             <ol style="list-style-type: none"> <li>a. HIV-positive</li> <li>b. Cancer (regardless of remission state)</li> <li>c. Cerebral palsy</li> <li>d. Muscular dystrophy</li> <li>e. Known genetic disorder</li> <li>f. Blood dyscrasia</li> <li>g. Ongoing gastrointestinal disease</li> <li>h. Endocrine disorder (e.g., hypothyroidism, diabetes)</li> <li>i. Pancreatic disease (endocrine or exocrine)</li> <li>j. Depression/bi-polar or other psychiatric disease</li> </ol> </li> <li>7. Evidence of severe, moderate or uncontrolled systemic disease</li> <li>8. Any co-morbid condition which in the Investigator's or Medical Director's opinion makes it undesirable for the subject to participate in the trial or would jeopardize compliance with the protocol.</li> <li>9. Supplementation with any of the following within 30 days of entering the study:             <ol style="list-style-type: none"> <li>a. Any enzyme product or a product containing pancreatic/digestive enzymes of plant or animal origin</li> <li>b. Pancreatin, thyroid, or adrenal extracts, either synthetic plant or animal-based</li> <li>c. Essential fatty acids/omega/ or other supplement containing product</li> <li>d. Amino acids, or amino acid containing products</li> <li>e. Any secretin product including transdermal, oral, or injectable</li> <li>f. Vitamin B12/folate either oral or injectable</li> <li>g. Chelating agents / chelation therapy</li> <li>h. Any other investigational drug or therapy/oncology drug/anti-helmenthic / anti-yeast drug</li> <li>i. Off-label medications</li> </ol> </li> </ol> |

**eTable 3. Participant Demographics****Demographics in Age 3 to 6 Years (ITT Population)**

|                                  | Age 3 to 6 Years |                | Age 3 to 6 Years with Moderate to Severe ASD <sup>1</sup> |                |
|----------------------------------|------------------|----------------|-----------------------------------------------------------|----------------|
|                                  | CM-AT (N=92)     | Placebo (N=98) | CM-AT (N=29)                                              | Placebo (N=40) |
| Age (years)                      |                  |                |                                                           |                |
| N                                | 92               | 98             | 29                                                        | 40             |
| Mean                             | 4.5              | 4.5            | 4.7                                                       | 4.4            |
| Standard deviation               | 0.8              | 0.8            | 0.7                                                       | 0.8            |
| Median                           | 4.6              | 4.7            | 4.7                                                       | 4.5            |
| Minimum, Maximum                 | 3.0, 5.9         | 3.0, 5.9       | 3.5, 5.7                                                  | 3.0, 5.9       |
| Gender, n (%)                    |                  |                |                                                           |                |
| Male                             | 71 ( 77.2)       | 79 ( 80.6)     | 20 ( 69.0)                                                | 30 ( 75.0)     |
| Female                           | 21 ( 22.8)       | 19 ( 19.4)     | 9 ( 31.0)                                                 | 10 ( 25.0)     |
| Race, n (%)                      |                  |                |                                                           |                |
| White                            | 61 ( 66.3)       | 70 ( 71.4)     | 16 ( 55.2)                                                | 28 ( 70.0)     |
| Asian                            | 12 ( 13.0)       | 10 ( 10.2)     | 6 ( 20.7)                                                 | 3 ( 7.5)       |
| Black or African American        | 10 ( 10.9)       | 8 ( 8.2)       | 3 ( 10.3)                                                 | 5 ( 12.5)      |
| Multiple                         | 7 ( 7.6)         | 6 ( 6.1)       | 3 ( 10.3)                                                 | 4 ( 10.0)      |
| Other                            | 2 ( 2.2)         | 3 ( 3.1)       | 1 ( 3.4)                                                  | 0 ( 0.0)       |
| American Indian or Alaska Native | 0 ( 0.0)         | 1 ( 1.0)       | 0 ( 0.0)                                                  | 0 ( 0.0)       |
| Ethnicity                        |                  |                |                                                           |                |
| n (%)                            |                  |                |                                                           |                |
| Not Hispanic or Latino           | 71( 77.2)        | 80( 81.6)      |                                                           |                |
| Hispanic or Latino               | 20 ( 21.7)       | 18( 18.4)      |                                                           |                |

**eTable 4. Autism Diagnostic Interview Revised (ADI-R): Subscale Scores at Baseline**

| ADI-R Subscale |                                                             | Baseline |         |
|----------------|-------------------------------------------------------------|----------|---------|
|                |                                                             | Drug     | Placebo |
| A              | Social Interaction                                          | 21.7     | 22.2    |
| B              | Communication Verbal                                        | 15.0     | 15.1    |
| B              | Communication Non-Verbal                                    | 10.5     | 10.8    |
| C              | Restricted, Repetitive and Stereotyped Patterns of Behavior | 6.9      | 7.2     |
| D              | Abnormality of Development Evident at or before 36 Months   | 4.1      | 4.2     |

**eFigure. Neurodevelopmental Gap in Brain Synthesis Capacity in Autistic Children Compared With Non-Autistic Children**

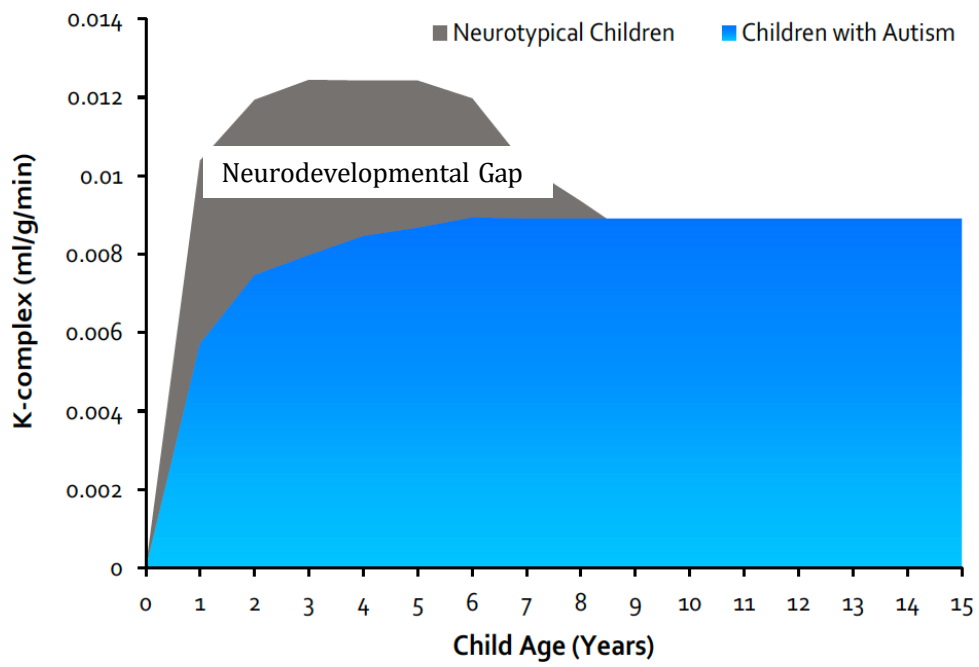

eTable 5. Participant Disposition

**Subject Disposition in Age 3 to 6 Years (ITT Population)**

|                                          | Age 3 to 6 Years |                   | Age 3 to 6 Years with Moderate to Severe ASD (1) |                   |
|------------------------------------------|------------------|-------------------|--------------------------------------------------|-------------------|
|                                          | CM-AT<br>(N=92)  | Placebo<br>(N=98) | CM-AT<br>(N=29)                                  | Placebo<br>(N=40) |
|                                          | n (%)            | n (%)             | n (%)                                            | n (%)             |
| Completed Study                          | 71 (77.2)        | 80 (81.6)         | 24 (82.8)                                        | 34 (85.0)         |
| Discontinued Study                       | 21 (22.8)        | 18 (18.4)         | 5 (17.2)                                         | 6 (15.0)          |
| Primary Reason for Early Discontinuation |                  |                   |                                                  |                   |
| Adverse event                            | 0 (0.0)          | 0 (0.0)           | 0 (0.0)                                          | 0 (0.0)           |
| Noncompliance                            | 8 (8.7)          | 1 (1.0)           | 2 (6.9)                                          | 0 (0.0)           |
| Protocol violation                       |                  |                   | 0 (0.0)                                          | 1 (2.5)           |
| Withdrawal of consent                    | 5 (5.4)          | 6 (6.1)           | 2 (6.9)                                          | 2 (5.0)           |
| Lost to Follow-up                        |                  |                   | 1 (3.4)                                          | 1 (2.5)           |
| Other                                    |                  |                   | 0 (0.0)                                          | 1 (2.5)           |

<sup>1</sup>Defined as a baseline CGI-S score  $\geq 4$  and ABC-I  $\geq 18$ .

**eTable 6. Fecal Chymotrypsin Data**

| <b>Group</b>        | <b>FCT @ Baseline</b> | <b>FCT @ Week 12</b> | <b>Change</b> |
|---------------------|-----------------------|----------------------|---------------|
| <b>CM-AT</b>        | <b>7.46</b>           | <b>10.94</b>         | <b>3.47</b>   |
| <b>Placebo</b>      | <b>7.69</b>           | <b>8.69</b>          | <b>1.00</b>   |
| <b>p Value &lt;</b> |                       |                      | <b>.0383</b>  |



**eTable 7. Responder Analysis (30%)**

|                | <b>CM-AT</b> |          | <b>Placebo</b> |          |
|----------------|--------------|----------|----------------|----------|
|                | <b>N</b>     | <b>%</b> | <b>N</b>       | <b>%</b> |
| All Responders | 77           | 100%     | 67             | 100%     |
| ≥ 30% Response | 61           | 79%      | 42             | 62%      |

e Table 8.

**CGI: Severity**

|         | <b>CGI-S Screening</b> | <b>CGI-S Wk 12</b> | <b>CGI-S Change</b> |
|---------|------------------------|--------------------|---------------------|
| CM-AT   | 3.53                   | 3.26               | -0.37               |
| Placebo | 3.50                   | 3.42               | -0.19               |

**eTable 9.**

**CGI: Improvement**

| Group   | Wk2  | Wk6  | Wk12 |
|---------|------|------|------|
| CM-AT   | 2.61 | 2.32 | 2.08 |
| PLACEBO | 2.67 | 2.38 | 2.28 |

**eTable 10.**

**CGI: Improvement—Most Severe (ABC-I  $\geq 18$ , CGI-S  $\geq 4$ )**

| Group   | Wk2  | Wk6  | Wk12 |
|---------|------|------|------|
| CM-AT   | 2.47 | 2.17 | 1.81 |
| PLACEBO | 2.70 | 2.18 | 2.02 |
