# Supplementary material for: Pancreatic Replacement Therapy for Maladaptive Behaviors in Preschool Children With Autism Spectrum Disorder
Source: PubMed Central journal article supplement — JAMA Netw Open. 2023 Nov 30;6(11):e2344136. doi: 10.1001/jamanetworkopen.2023.44136 (PMC10690476; doi:10.1001/jamanetworkopen.2023.44136), 2023-11-30
Supplement: jamanetwopen-e2344136-s002.pdf [file jamanetwopen-e2344136-s002.pdf]

## Data Sharing Statement

Pearson. Pancreatic Replacement Therapy for Maladaptive Behaviors in Preschool Children With Autism Spectrum Disorder. *JAMA Netw Open*. Published November 22, 2023. doi:10.1001/jamanetworkopen.2023.44136

### Data

**Data available:** Yes

**Data types:** Deidentified participant data, Data (not involving human participants), Data dictionary

**How to access data:** Curemark, LLC 800 Westchester Avenue, Suite S-528 Rye Brook, NY 10573

**When available:** beginning date: 07-15-2025

### Supporting Documents

**Document types:** None

### Additional Information

**Who can access the data:** Qualified researchers.

**Types of analyses:** All analyses

**Mechanisms of data availability:** Qualified researchers may request access to both de-identified participant data and demographic, baseline and safety data by submitting a detailed hypothesis-driven statistical analysis plan that is collaboratively developed by the requestor and company subject matter experts.

**Any additional restrictions:** The data that supports the findings in this publication will be available after an 18-month embargo from the date of publication to allow for commercialization of the research findings. We are estimating that this will be sometime in 2025.
